# Supplementary material
Source: Springer Nature journal article supplement (https://www.springermedizin.de/resource/supplementary/13276_2014_28_MOESM1_ESM.pdf/9676614)

**Expression  
Cassette**

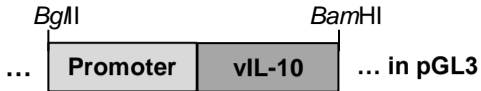

**pBSLHE-TR**

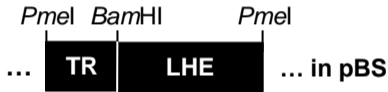

**Targeting  
Cassette**

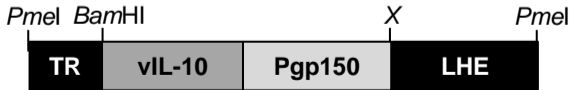

**Pgp150.vIL-10L**

Supplement: MOESM1 [file 9676614]
